# Supplementary material
Source: publisher site journal article supplement (https://www.dovepress.com/article/344075)
Supplement: Supplementary file 1 [file get_supplementary_file.php]

**Supplementary files**


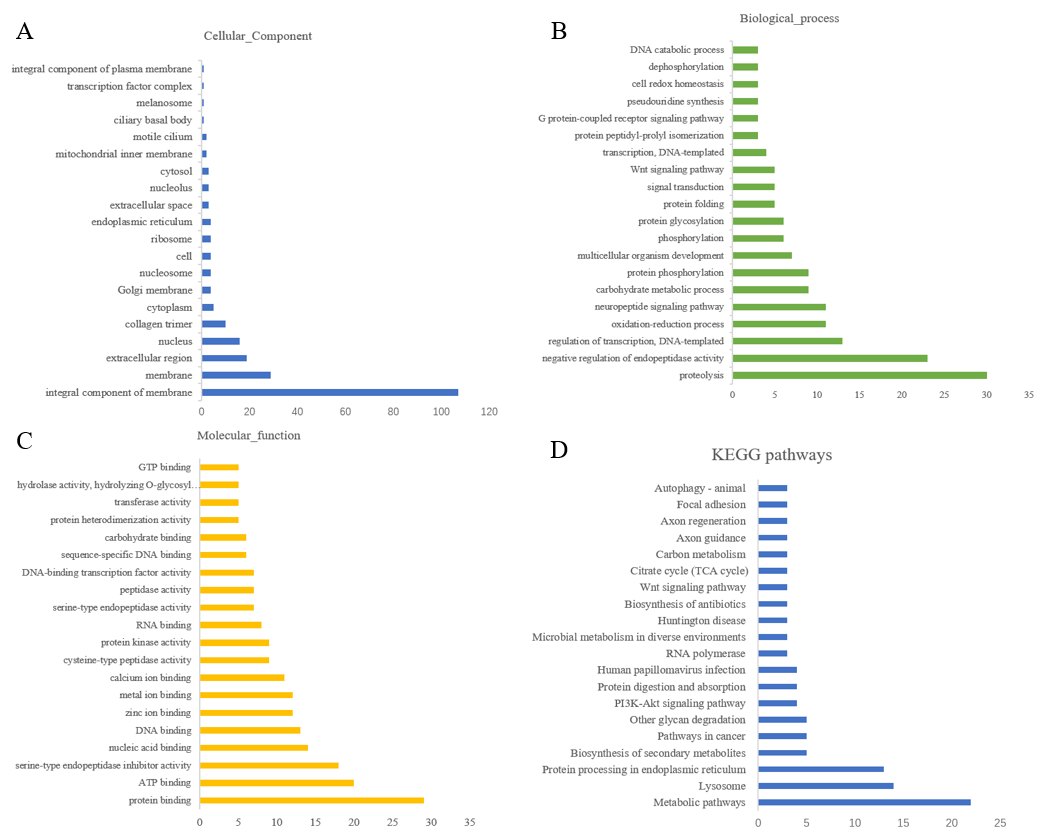


**Supplementary Figure S1.** Results of GO Annotation and KEGG pathway analysis. (A) cellular component (GO), (B) biological process(GO), (C) molecular function(GO), (D) KEGG pathway analysis

**Supplementary Figure S**
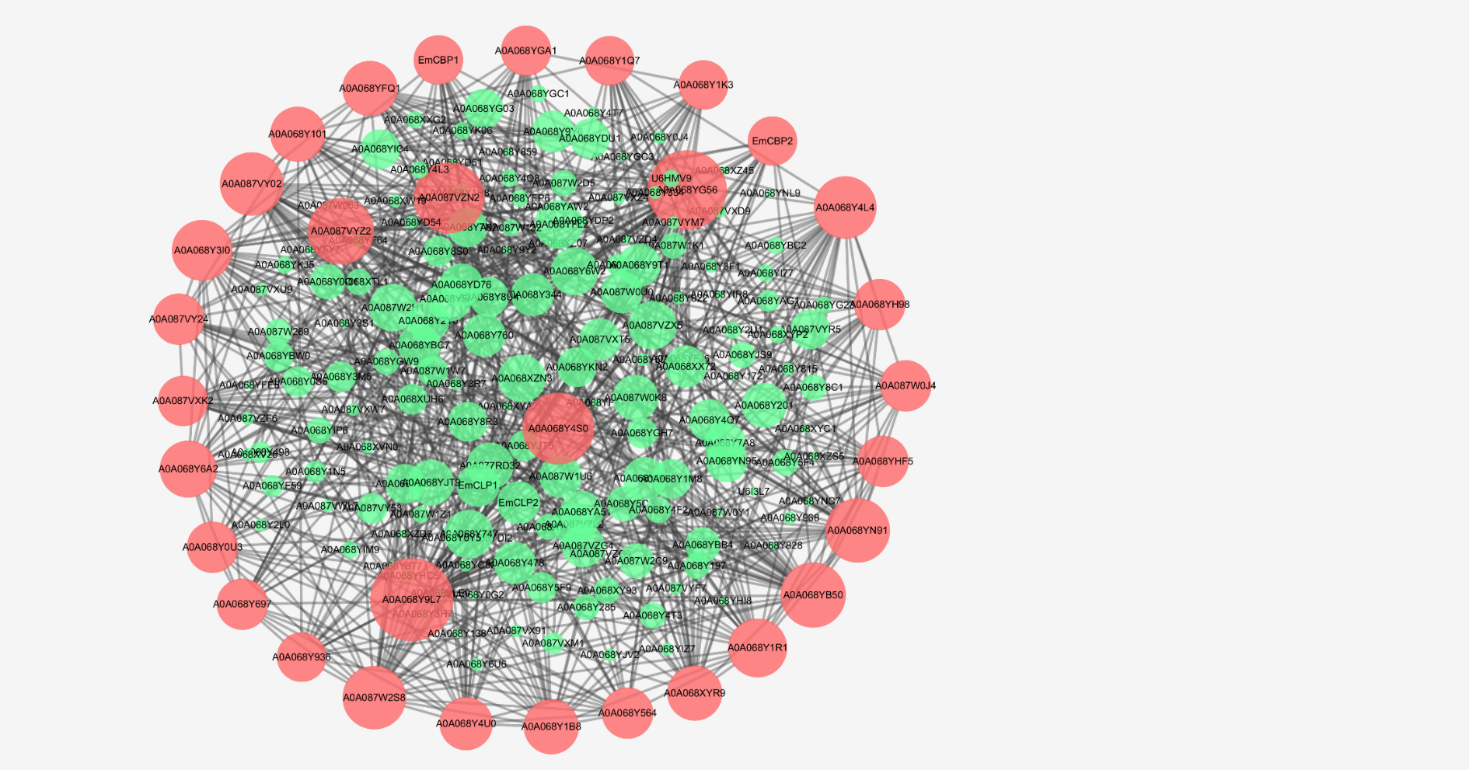
**2.** Protein-protein interaction network of Em-ESP. Each circle represents an ESP, and the size of the circle represents the number of interactions with other ESP. The larger the circle, the more the interaction; the red circle represents the core protein, and the green one represents the non-core protein.

**Supplementary Table S1. Annotation of Em-ESP family (Top 20)**

| IPR Family | Annotation | Number |
| --- | --- | --- |
| IPR036880 | Pancreatic trypsin inhibitor Kunitz domain superfamily | 18 |
| IPR013783 | Immunoglobulin-like fold | 14 |
| IPR008860 | Taeniidae antigen | 9 |
| IPR017853 | Glycoside hydrolase superfamily | 9 |
| IPR038765 | Papain-like cysteine peptidase superfamily | 9 |
| IPR009057 | Homeobox-like domain superfamily | 8 |
| IPR036179 | Immunoglobulin-like domain superfamily | 8 |
| IPR029058 | Alpha/Beta hydrolase fold | 6 |
| IPR013780 | Glycosyl hydrolase, all-beta | 5 |
| IPR035940 | CAP superfamily | 5 |
| IPR036869 | Chaperone J-domain superfamily | 5 |
| IPR036236 | Zinc finger C2H2 superfamily | 5 |
| IPR009003 | Peptidase S1, PA clan | 5 |
| IPR009030 | Growth factor receptor cysteine-rich domain superfamily | 4 |
| IPR036055 | LDL receptor-like superfamily | 4 |
| IPR001283 | Cysteine-rich secretory protein-related | 4 |
| IPR013126 | Heat shock protein 70 family | 4 |
| IPR029047 | Heat shock protein 70kD, peptide-binding domain superfamily | 4 |
| IPR029044 | Nucleotide-diphospho-sugar transferases | 4 |
| IPR036116 | Fibronectin type III superfamily | 4 |

**Supplementary Table S2. Annotation of Em-ESP domain (Top 20)**

| IPR Domain | Annotation | Number |
| --- | --- | --- |
| IPR002223 | Pancreatic trypsin inhibitor Kunitz domain | 18 |
| IPR000668 | Peptidase C1A, papain C-terminal | 9 |
| IPR039417 | Papain-like cysteine endopeptidase | 7 |
| IPR007110 | Immunoglobulin-like domain | 6 |
| IPR013087 | Zinc finger C2H2-type | 6 |
| IPR000742 | EGF-like domain | 6 |
| IPR001356 | Homeobox domain | 6 |
| IPR013201 | Cathepsin propeptide inhibitor domain (I29) | 6 |
| IPR001254 | Serine proteases, trypsin domain | 5 |
| IPR001623 | DnaJ domain | 5 |
| IPR017452 | GPCR, rhodopsin-like, 7TM | 4 |
| IPR000504 | RNA recognition motif domain | 4 |
| IPR008598 | Drought induced 19 protein type, zinc-binding domain | 4 |
| IPR014044 | CAP domain | 4 |
| IPR020479 | Homeobox domain, metazoa | 3 |
| IPR001881 | EGF-like calcium-binding domain | 3 |
| IPR003961 | Fibronectin type III | 3 |
| IPR005123 | Oxoglutarate/iron-dependent dioxygenase | 3 |
| IPR002048 | EF-hand domain | 3 |
| IPR002049 | Laminin EGF domain | 3 |

**Supplementary Table S3. Annotation of Em-ESP functional site (Top 20)**

| IPR Site | Annotation | Number |
| --- | --- | --- |
| IPR020901 | Proteinase inhibitor I2, Kunitz, conserved site | 16 |
| IPR000169 | Cysteine peptidase, cysteine active site | 9 |
| IPR025661 | Cysteine peptidase, asparagine active site | 9 |
| IPR025660 | Cysteine peptidase, histidine active site | 9 |
| IPR013032 | EGF-like, conserved site | 7 |
| IPR017970 | Homeobox, conserved site | 4 |
| IPR018097 | EGF-like calcium-binding, conserved site | 4 |
| IPR018244 | Allergen V5/Tpx-1-related, conserved site | 4 |
| IPR018253 | DnaJ domain, conserved site | 3 |
| IPR020392 | Pancreatic hormone-like, conserved site | 3 |
| IPR018114 | Serine proteases, trypsin family, histidine active site | 3 |
| IPR000047 | Helix-turn-helix motif | 3 |
| IPR018247 | EF-Hand 1, calcium-binding site | 3 |
| IPR023415 | Low-density lipoprotein (LDL) receptor class A, conserved site | 2 |
| IPR017948 | Transforming growth factor beta, conserved site | 2 |
| IPR018161 | Wnt protein, conserved site | 2 |
| IPR016130 | Protein-tyrosine phosphatase, active site | 2 |
| IPR020892 | Cyclophilin-type peptidyl-prolyl cis-trans isomerase, conserved site | 2 |
| IPR017937 | Thioredoxin, conserved site | 1 |
| IPR018297 | Adenylyl cyclase class-4/guanylyl cyclase, conserved site | 1 |

**Supplementary Table S4. Em-ESP amino acid composition**

| Amino acid | Amount | proportion |
| --- | --- | --- |
| Ala (A) | 46 | 6.7% |
| Arg (R) | 37 | 5.4% |
| Asn (N) | 26 | 3.8% |
| Asp (D) | 29 | 4.3% |
| Cys (C) | 45 | 6.6% |
| Gln (Q) | 22 | 3.2% |
| Glu (E) | 39 | 5.7% |
| Gly (G) | 58 | 8.5% |
| His (H) | 17 | 2.5% |
| Ile (I) | 33 | 4.8% |
| Leu (L) | 36 | 5.3% |
| Lys (K) | 35 | 5.1% |
| Met (M) | 6 | 0.9% |
| Phe (F) | 22 | 3.2% |
| Pro (P) | 48 | 7.0% |
| Ser (S) | 57 | 8.4% |
| Thr (T) | 46 | 6.7% |
| Trp (W) | 14 | 2.1% |
| Tyr (Y) | 24 | 3.5% |
| Val (V) | 42 | 6.2% |
| Pyl (O) | 0 | 0.0% |
| Sec (U) | 0 | 0.0% |

**Supplementary Table S5. Antigen epitopes of Em-ESP**

| No. | Start site | Sequence | Termination site |
| --- | --- | --- | --- |
| 1 | 4 | SSGCLSFIFLACTAADPVEH | 23 |
| 2 | 56 | AAEILCEA | 63 |
| 3 | 70 | EFAECPKR | 77 |
| 4 | 79 | CRANVDCWVAYGKPQQCVCDPHFCGLVCLPVGSRCSP | 115 |
| 5 | 121 | NGYILLRD | 128 |
| 6 | 131 | VGATVDYTCDAGFTV | 145 |
| 7 | 149 | RKRHCLAT | 156 |
| 8 | 161 | GPEPVCT | 167 |
| 9 | 170 | TDHCFSPPYIQNA | 182 |
| 10 | 222 | YSTIVCVGN | 230 |
| 11 | 235 | KKLDCHRVSCPE | 246 |
| 12 | 264 | QGTAVQFCND | 273 |
| 13 | 275 | YTIHCPG | 281 |
| 14 | 290 | SSKSCSRVCQA | 300 |
| 15 | 307 | KSAKCIAVTCPKL | 319 |
| 16 | 327 | ISGYQTKVNGVVAFEC | 342 |
| 17 | 352 | SFRKCQL | 358 |
| 18 | 365 | EPAQCQVRDCGSP | 377 |
| 19 | 380 | ISNAVVKFSS | 389 |
| 20 | 393 | GSKAYFSCEA | 402 |
| 21 | 404 | TKSSVSTLELICG | 416 |
| 22 | 423 | SWLPFPYPACYKHCSVPDIVSANISL | 448 |
| 23 | 459 | IVAEATLLEHGVTIAVCCHSGFSLSKG | 485 |
| 24 | 504 | WSHEVECQPAQCTT | 517 |
| 25 | 522 | IPNALARFYGLHHGSVVRYQCFPG | 545 |
| 26 | 568 | NTWPLAHDRYSVRCEY | 583 |
| 27 | 589 | ELPACVQVRCSRPPVPEGVEIYLVG | 613 |
| 28 | 621 | DSKQILPTHGAIVEYSCLKD | 640 |
| 29 | 648 | KYTFCID | 654 |
| 30 | 661 | ETPICTKITHDIIPPSWL | 678 |


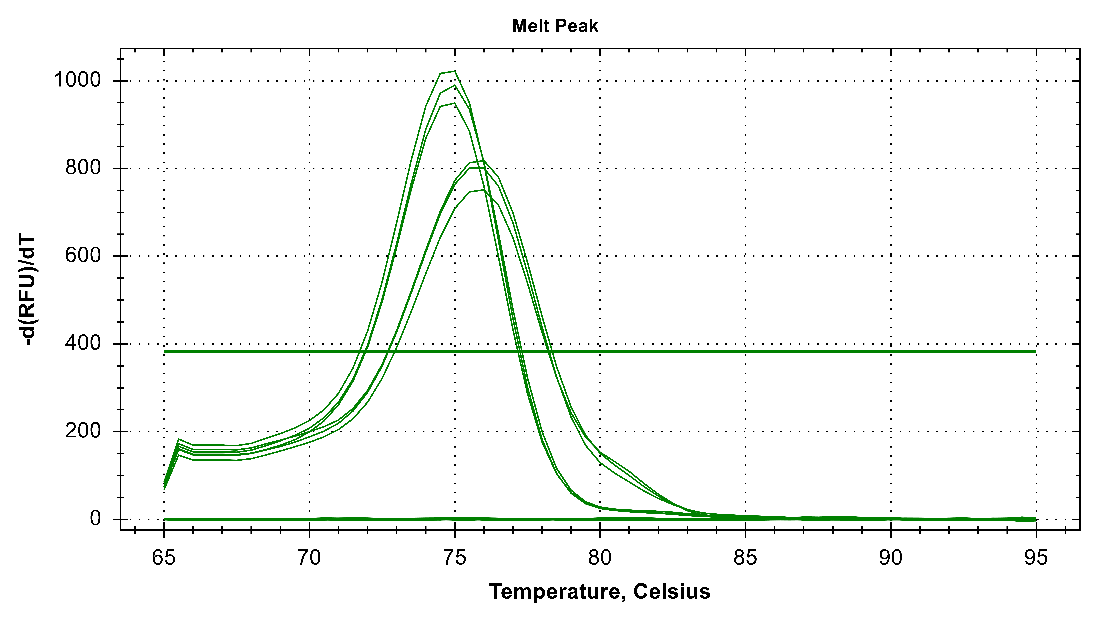


**Supplementary Figure S3.** EmuJ_000439500 mRNA expression in E.m lesion of mice.

**
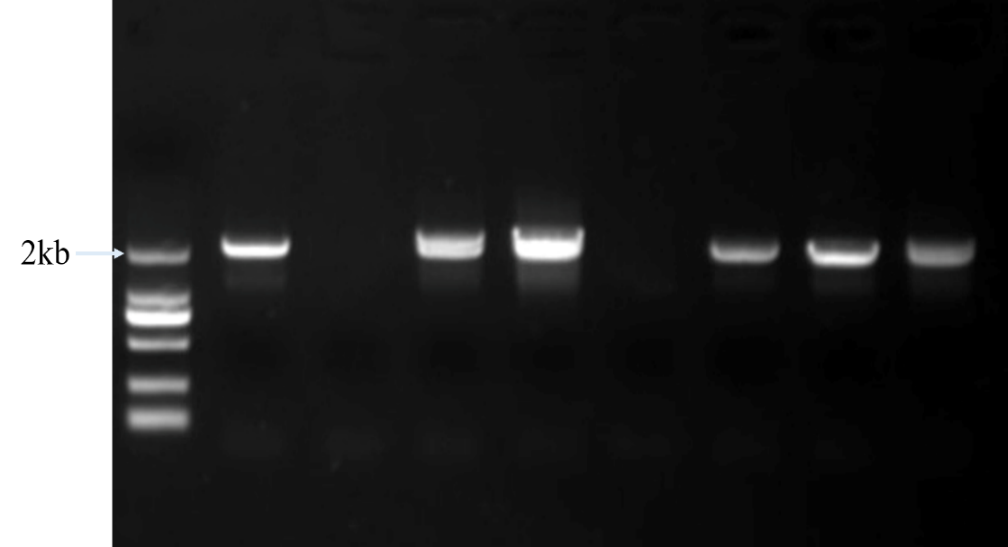
**

**Supplementary Figure S4. Verification of pPICZαA recombinant vector**

**
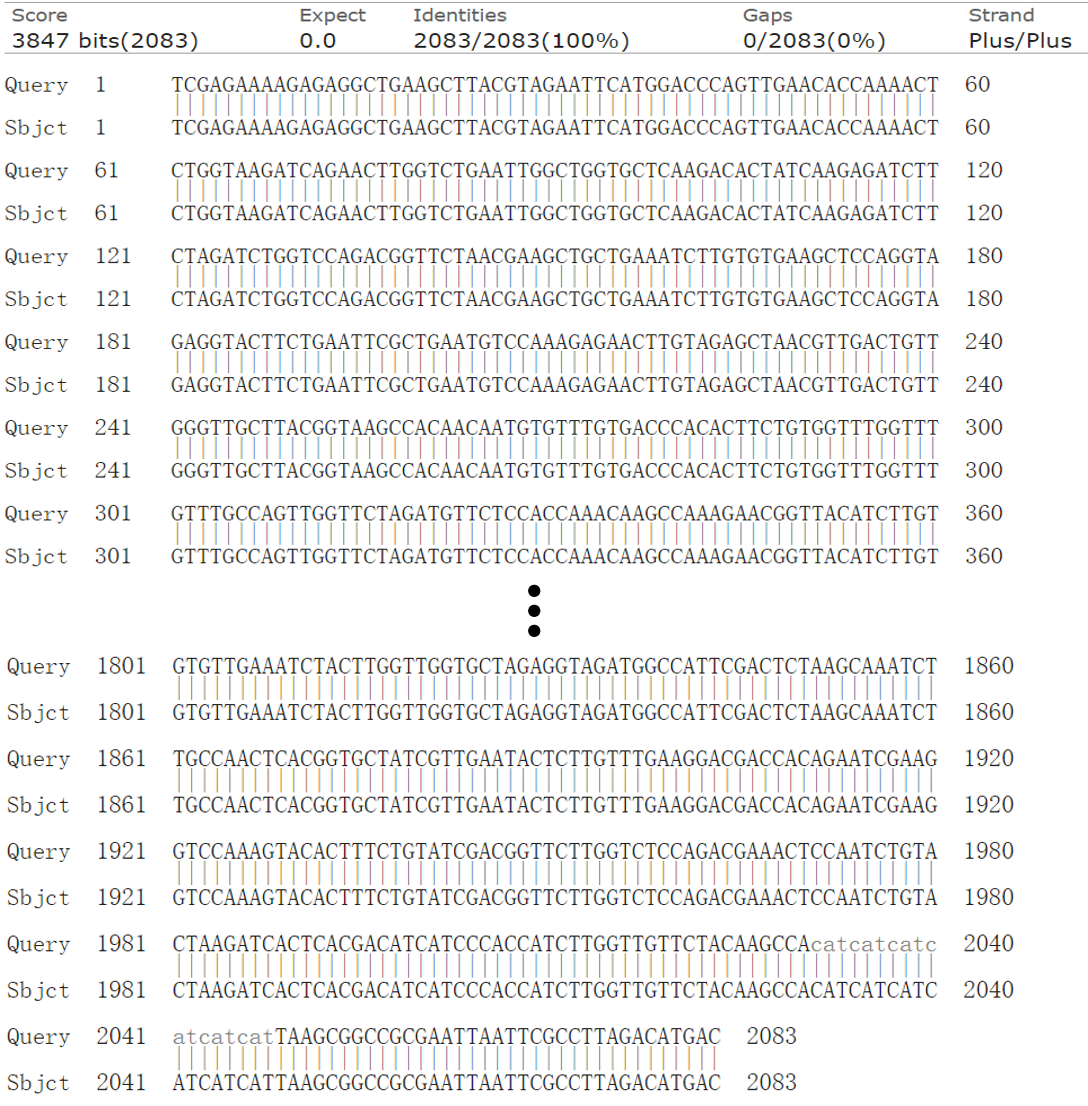
**

**Supplementary Figure S5. Sequencing results pPICZαA recombinant vector sequence and target sequence**


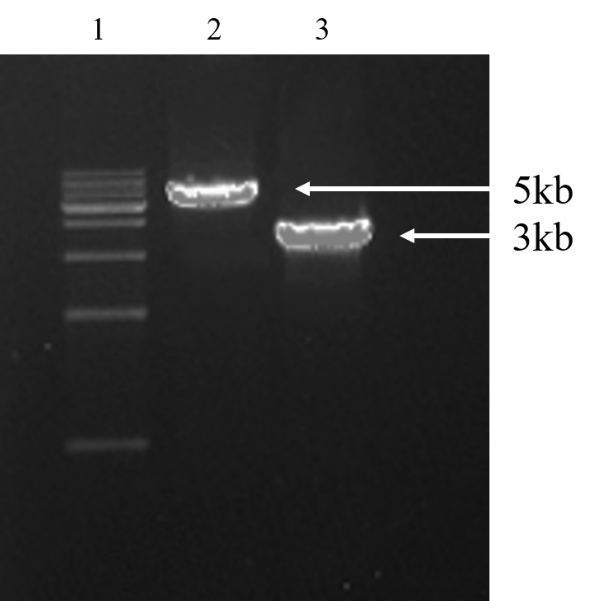


**Supplementary Figure S6. Linearization of pPICZαA recombinant vector and empty vector. Lane 1: 1kb DNA Ladder Marker; Lane 2: pPICZαA recombinant vector; Lane 3: Empty pPICZαA**


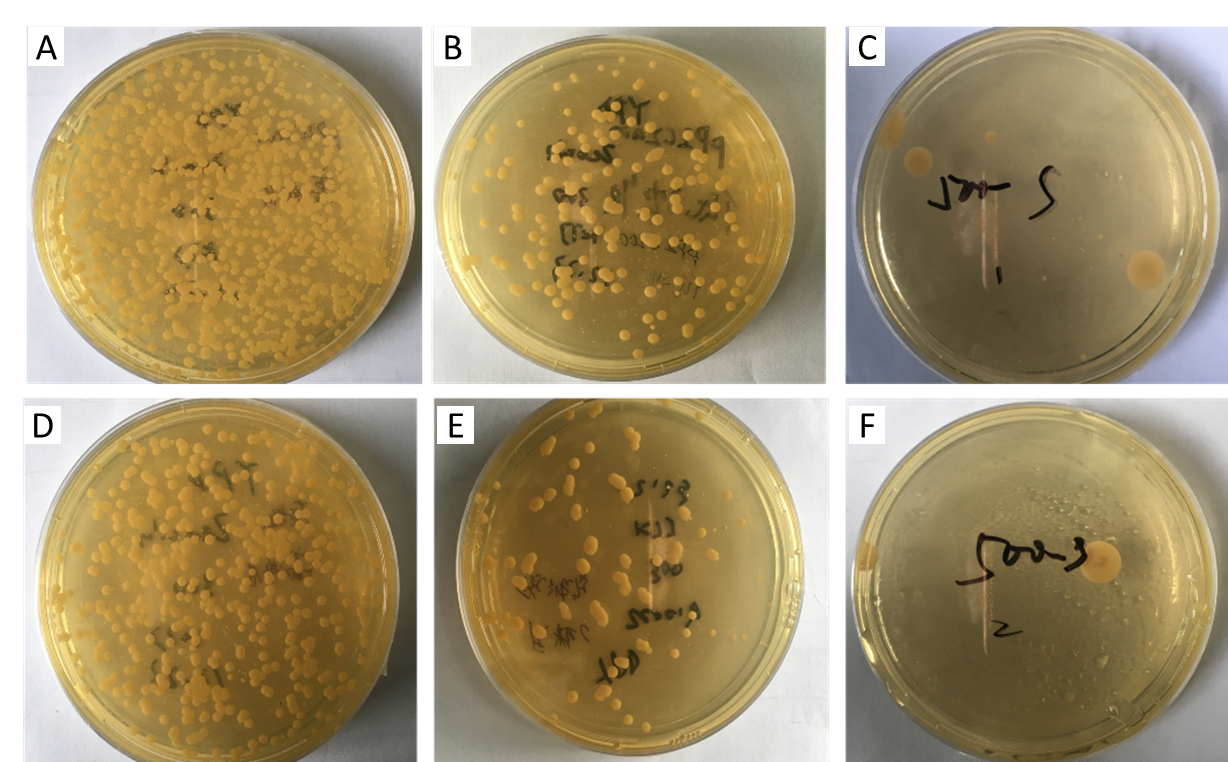


**Supplementary Figure S7. (A B C) Growth of yeast transferred with pPICZαA recombinant vector at 100 ug / ml, 300 ug / ml and 500 ug / ml bleomycin concentration; (D E F) growth of yeast transferred with empty vector at 100 ug / ml, 300 ug / ml and 500 ug / ml bleomycin concentration.**
